# Supplementary material
Source: PubMed Central journal article supplement (PMC4995159)

*Egr2*<sup>Cre</sup>; *ROSA*<sup>tdTomato</sup>

E12.5

tdTomato/En1

r3

r4

r5

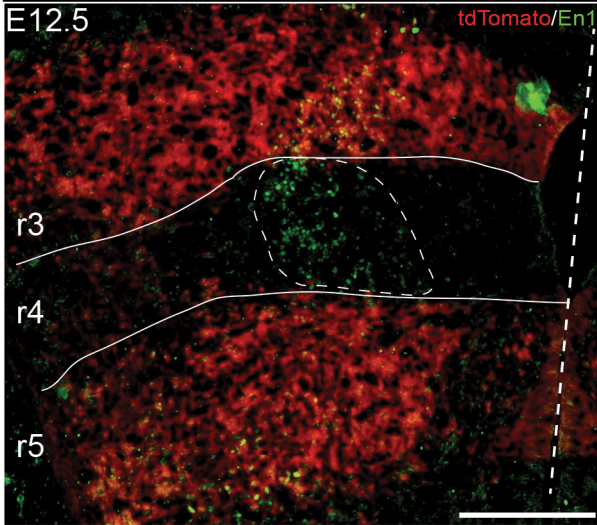

Supplement: NIHMS762290-supplement-Supp_Fig_S1.pdf [file NIHMS762290-supplement-Supp_Fig_S1.pdf]

Anterior

Posterior

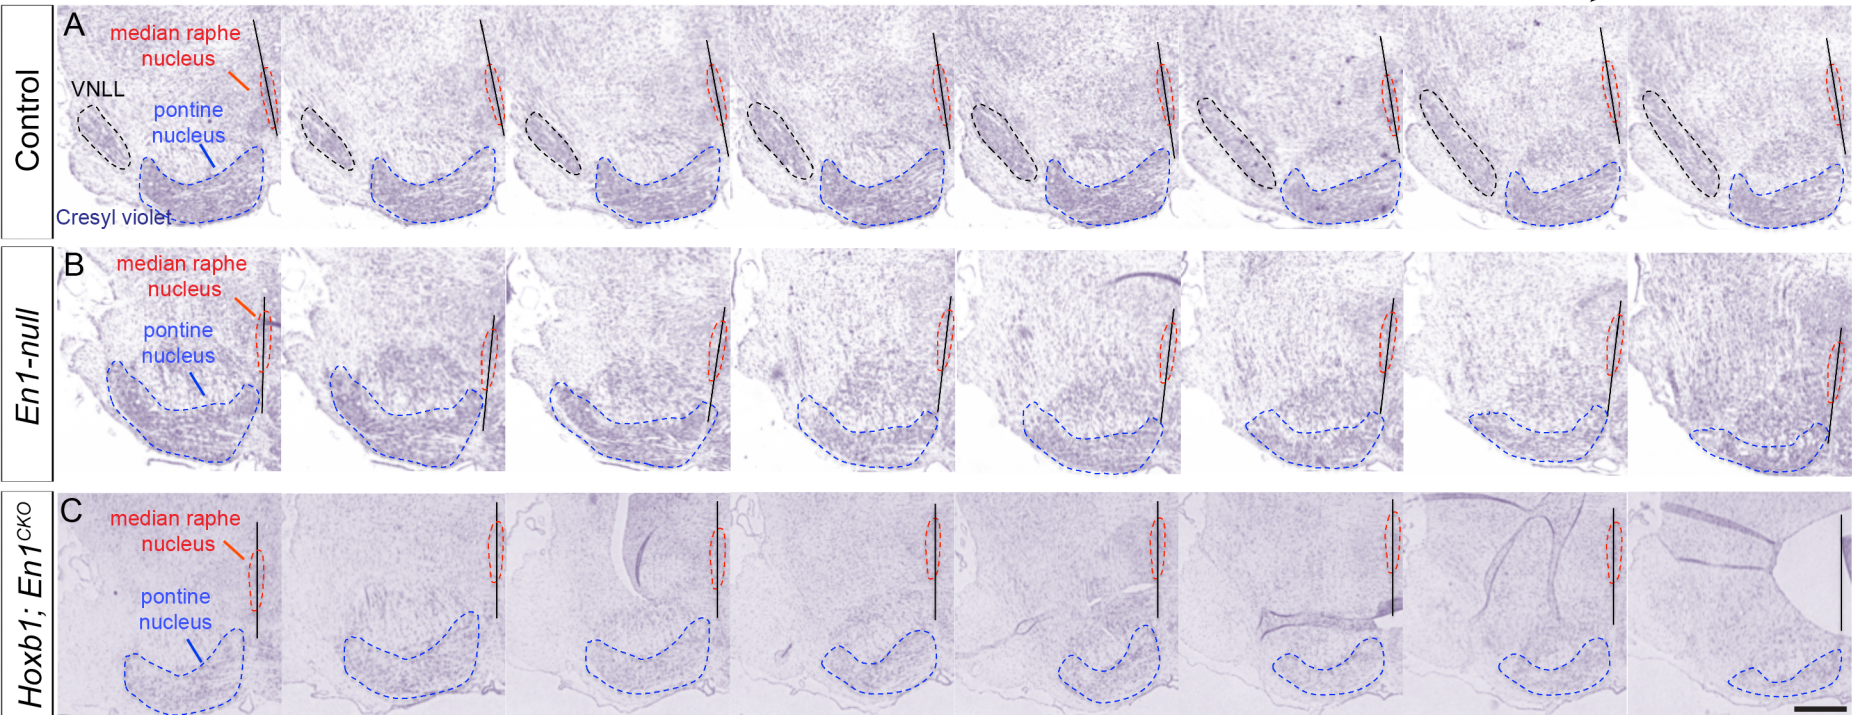

Supplement: NIHMS762290-supplement-Supp_Fig_S2.pdf [file NIHMS762290-supplement-Supp_Fig_S2.pdf]
